# Supplementary material for: CRISPR activation screen in mice identifies novel membrane proteins enhancing pulmonary metastatic colonisation
Source: PubMed Central journal article supplement (PMC7987976; doi:10.1038/s42003-021-01912-w), 2021-03-23
Supplement: 42003_2021_1912_MOESM3_ESM.pdf [file 42003_2021_1912_MOESM3_ESM.pdf]

## Description of Additional Supplementary Files

**File name:** Supplementary Data 1

**Description:** Results of the RNAseq experiment showing differentially expressed genes in A375\_LRN cells in the in vivo context. Genes on this list were differentially expressed in VIVO\_L samples versus VIVO\_E samples, and not found as differentially expressed in VITRO\_L samples versus VITRO\_E samples (with a Padj of  $<0.01$  and a  $\text{Log}_2\text{FC}$  of  $\leq -1$  or  $\geq 1$ ).

Abbreviations:  $\text{Log}_2\text{FC}$ ,  $\text{Log}_2$  fold change; Padj, adjusted P value.

**File name:** Supplementary Data 2

**Description:** Source data for the main figures.
